# Supplementary material for: Hydrogen-bonded mesomorphic complexes combining hydrophilic and fluorophilic molecular segments
Source: Royal Society of Chemistry journal article supplement (doi:10.1039/c7sm01801k), 2018-01-01
Supplement: c7sm01801k1.pdf [file c7sm01801k1.pdf]

## **Hydrogen-Bonded Mesomorphic Complexes Combining Hydrophilic and Fluorophilic Molecular Segments**

Laura Vogel, Dietmar Janietz\*

Fraunhofer Institute for Applied Polymer Research, Geiselbergstr. 69, D-14476 Potsdam-Golm,  
Germany

Marko Prehm, Carsten Tschierske\*

Institute of Chemistry, Organic Chemistry, Martin-Luther-University Halle-Wittenberg, Kurt-Mothes-  
Str. 2, D-06120 Halle/Saale, Germany

### **Supporting Information**

#### **Instrumental**

Texture observations were made using an Olympus BHS polarizing microscope in conjunction with a Linkam TMH/S 600 hot stage and a Linkam TP 92 control unit. Photo micrographs were obtained with an Olympus E20 digital mirror reflex camera. Calorimetric investigations were performed with a Netzsch DSC 200. Temperature depending IR spectroscopy was performed with a Digilab Scimitar FTS 2000 Series FT-IR spectrometer fitted with a Golden Gate Mk II ATR system (Specac Ltd., England). XRD patterns were recorded with Ni filtered and pin-hole collimated Cu-K $\alpha$  radiation; usual exposure time was 15 min. A small droplet of the compound was slowly cooled on a glass plate (rate: 0.1 K min<sup>-1</sup>) on a temperature-controlled heating stage and the sample detector distance was 10.15 cm. Diffraction patterns were recorded with a 2D detector (Vantec 500, Bruker). Photographs of CPK models were obtained with a Nikon D50 digital mirror reflex camera.

**Table S1.** Small angle X-ray diffraction data for the hexagonal columnar (Col<sub>h</sub>) mesophases of the binary (1:3) mixtures and (1:1) mixtures of the (oligo)ethylene glycol substituted diaminotriazine **1** with the two-chain and three-chain partially fluorinated benzoic acids **2**-[F<sub>x</sub>C<sub>y</sub>] and **3**-[F<sub>x</sub>C<sub>y</sub>].

| Mixture                                    | Scattering angle<br>( $2\theta$ ) | Reflections / nm |                   | Miller indices<br>( $hkl$ ) | Lattice constants<br>( $a_{\text{hex}}$ / nm) |
|--------------------------------------------|-----------------------------------|------------------|-------------------|-----------------------------|-----------------------------------------------|
|                                            |                                   | $d_{\text{obs}}$ | $d_{\text{calc}}$ |                             |                                               |
| (1:3) 1/2-[F <sub>6</sub> C <sub>4</sub> ] | 3.206                             | 2.76             | -                 | 100                         | 3.18                                          |
| (1:3) 1/3-[F <sub>6</sub> C <sub>4</sub> ] | 3.188                             | 2.77             | -                 | 100                         | 3.20                                          |
| (1:3) 1/3-[F <sub>6</sub> C <sub>6</sub> ] | 2.985                             | 2.96             | -                 | 100                         | 3.42                                          |
|                                            | 5.149                             | 1.72             | 1.71              | 110                         |                                               |
|                                            | 5.944                             | 1.49             | 1.48              | 200                         |                                               |
| (1:1) 1/2-[F <sub>6</sub> C <sub>4</sub> ] | 2.902                             | 3.04             | -                 | 100                         | 3.51                                          |
|                                            | 5.041                             | 1.75             | 1.75              | 110                         |                                               |
|                                            | 5.818                             | 1.52             | 1.52              | 200                         |                                               |
| (1:2) 1/2-[F <sub>6</sub> C <sub>4</sub> ] | 3.00                              | 2.94             | -                 | 100                         | 3.40                                          |
|                                            | 5.18                              | 1.71             | 1.70              | 110                         |                                               |
|                                            | 5.99                              | 1.47             | 1.47              | 200                         |                                               |
| (1:1) 1/3-[F <sub>6</sub> C <sub>4</sub> ] | 3.068                             | 2.88             | -                 | 100                         | 3.33                                          |
|                                            | 6.135                             | 1.44             | 1.44              | 200                         |                                               |
|                                            | 8.027                             | 1.10             | 1.09              | 210                         |                                               |
| (1:1) 1/3-[F <sub>6</sub> C <sub>6</sub> ] | 2.902                             | 3.04             | -                 | 100                         | 3.51                                          |
|                                            | 5.037                             | 1.75             | 1.75              | 110                         |                                               |
|                                            | 5.841                             | 1.51             | 1.52              | 200                         |                                               |

**Table S2.** Calculations of the molecular volume ( $V_{\text{mol}}$ ), volume of the hypothetical unit cells ( $V_{\text{cell}}$ ) and number of [1:2] or [1:3] triazine/acid adducts in these unit cells ( $n_{\text{cell}}$ ).

| Mixture                                    | $V_{\text{cell}}$ (nm <sup>3</sup> ) | $V_{\text{mol}}$ (nm <sup>3</sup> ) | $n_{\text{cell}}$ | triazine/acid adduct |
|--------------------------------------------|--------------------------------------|-------------------------------------|-------------------|----------------------|
| (1:3) 1/2-[F <sub>6</sub> C <sub>4</sub> ] | 3.941                                | 2.935                               | 1.34              | [1:3]                |
| (1:3) 1/3-[F <sub>6</sub> C <sub>4</sub> ] | 3.991                                | 3.937                               | 1.01              | [1:3]                |
| (1:3) 1/3-[F <sub>6</sub> C <sub>6</sub> ] | 4.558                                | 4.045                               | 1.13              | [1:3]                |
| (1:1) 1/2-[F <sub>6</sub> C <sub>4</sub> ] | 4.802                                | 2.114                               | 2.27              | [1:2]                |
|                                            | 4.802                                | 3.736                               | 1.28              | [1:4]                |
| (1:2) 1/2-[F <sub>6</sub> C <sub>4</sub> ] | 4.505                                | 2.114                               | 2.13              | [1:2]                |
| (1:1) 1/3-[F <sub>6</sub> C <sub>4</sub> ] | 4.321                                | 3.937                               | 1.10              | [1:3]                |
| (1:1) 1/3-[F <sub>6</sub> C <sub>6</sub> ] | 4.802                                | 4.045                               | 1.19              | [1:3]                |

$V_{\text{cell}}$  = volume of the unit cell defined by the dimensions  $a^2 \times \sin(60^\circ) \times 0.45$  nm for hexagonal phases;

$V_{\text{mol}}$  = volume for a single triazine/acid adduct as calculated using the crystal volume increments;<sup>1</sup>

$n_{\text{cell}}$  = number of adducts in the unit cell, calculated according to  $n_{\text{cell}} = V_{\text{cell}}/V_{\text{mol}}$ .

**Table S3.** Calculation of the amount of phase-separated pure triazine **1** in equimolar mixtures with the fluorinated benzoic acids **2**-[F<sub>x</sub>C<sub>y</sub>] and **3**-[F<sub>x</sub>C<sub>y</sub>]<sup>a</sup>.

| Mixture                                    | Transition temperature (°C) /<br>Transition enthalpy (kJ/mol) | Phase separated triazine <b>1</b> |
|--------------------------------------------|---------------------------------------------------------------|-----------------------------------|
| (1:1) 1/2-[F <sub>6</sub> C <sub>4</sub> ] | 85.9 / 2.78                                                   | 28.4%                             |
| (1:2) 1/2-[F <sub>6</sub> C <sub>4</sub> ] | 84.9 / 0.94                                                   | 9.6%                              |
| (1:1) 1/3-[F <sub>6</sub> C <sub>4</sub> ] | 84.8 / 1.44                                                   | 14.7%                             |
| (1:1) 1/3-[F <sub>6</sub> C <sub>6</sub> ] | 85.2 / 2.19                                                   | 22.4%                             |

<sup>a</sup> The content of uncomplexed triazine **1** in the (1:1) mixtures was calculated from the enthalpy values of the phase transition Iso → IC\* (DSC 2<sup>nd</sup> cooling); the appropriate value obtained for the pure triazine (85.5°C / 9.8 kJ/mol) was used as reference and set to 100%.

# Supplementary figures

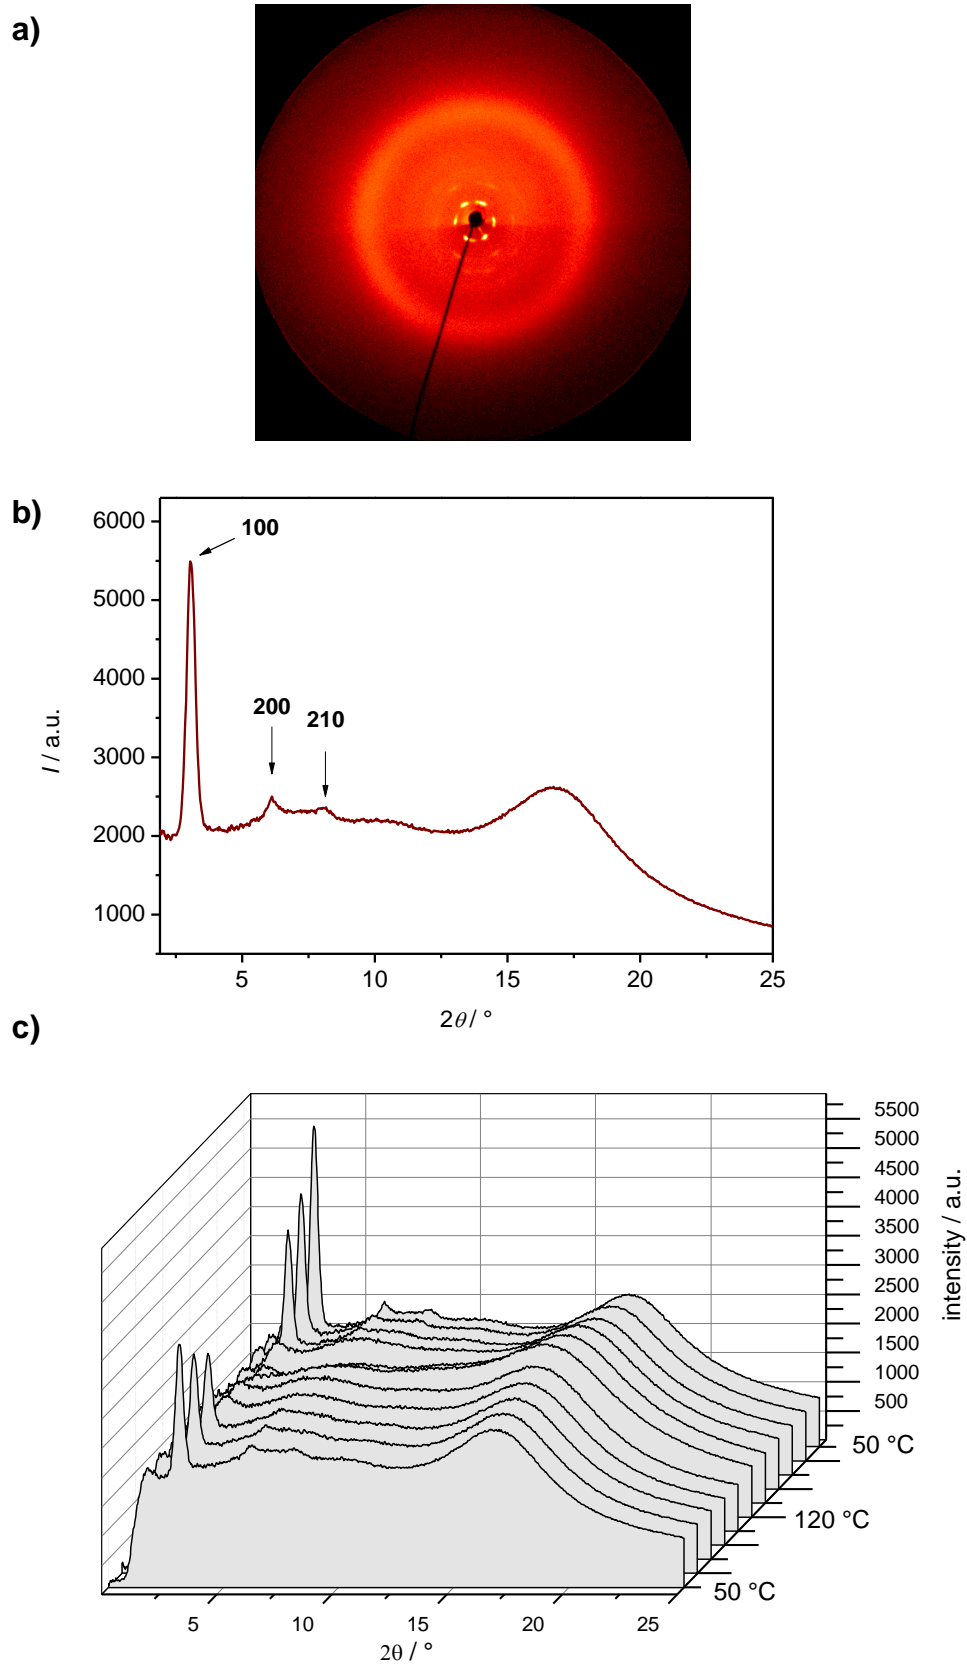

**Figure S1.** (a) XRD pattern of a surface aligned sample of the (1:1) mixture  $1/3\text{-[F}_6\text{C}_4\text{]}$  at  $50^\circ\text{C}$ ; (b)  $2\theta$  scan over this pattern; (c) Temperature depending XRD pattern of the equimolar mixture  $1/3\text{-[F}_6\text{C}_4\text{]}$ .

A)

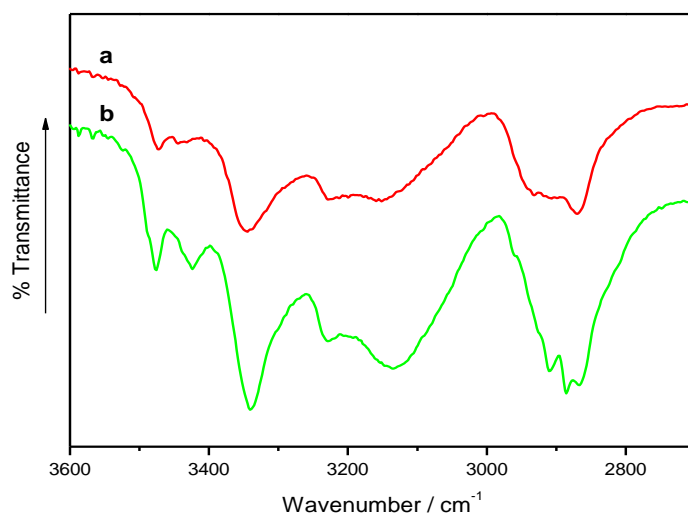

B)

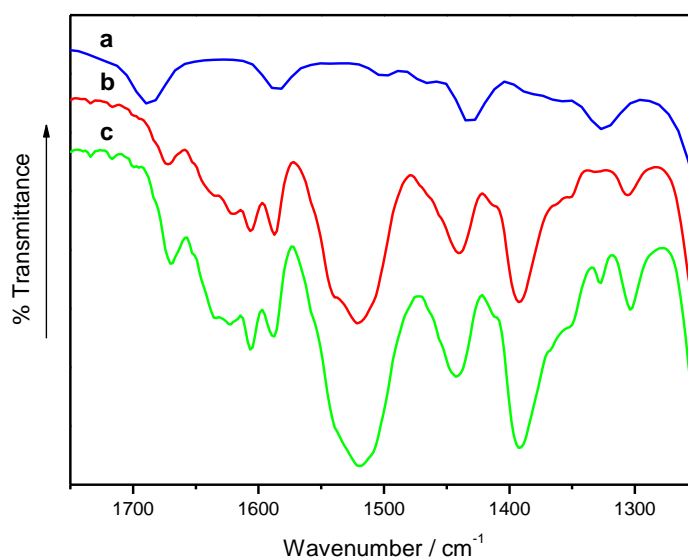

**Figure S2.** FT IR spectra on cooling at 50°C. (A) Spectral range from 2700 to 3600 cm<sup>-1</sup> of (a) the (1:1) mixture **1/3**-[F<sub>6</sub>C<sub>6</sub>]; (b) the pure diaminotriazine **1**. (B) region between 1250 and 1750 cm<sup>-1</sup> of (a) the pure benzoic acid **3**-[F<sub>6</sub>C<sub>6</sub>]; (b) the (1:1) mixture **1/3**-[F<sub>6</sub>C<sub>6</sub>]; (c) the pure diaminotriazine **1**.

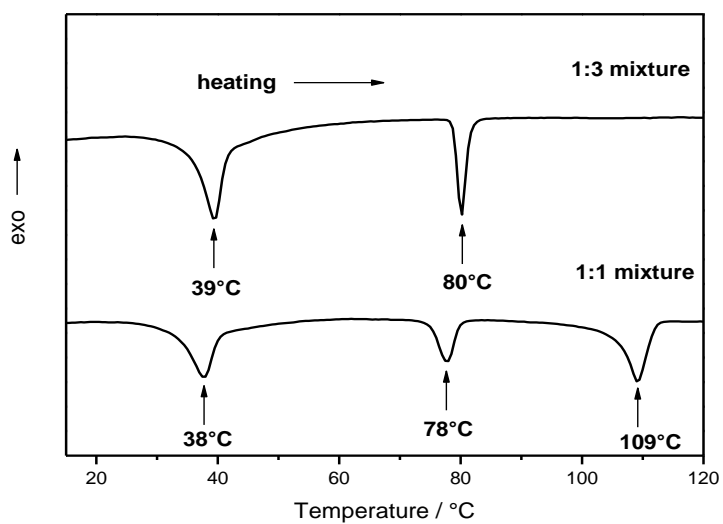

**Figure S3.** DSC traces (2<sup>nd</sup> heating with 10 K/min) of the (1:1) and (1:3) mixtures **1/3-[F<sub>6</sub>C<sub>4</sub>]** in comparison.

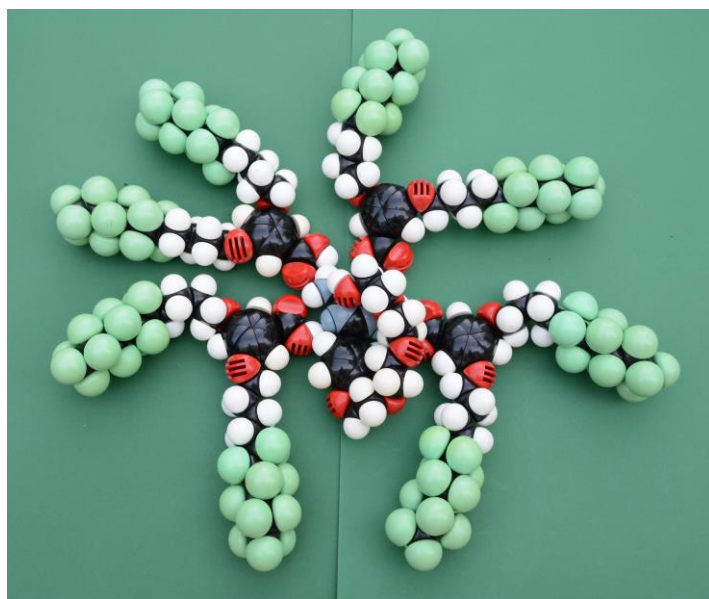

**Figure S4.** CPK model showing a [1:4] aggregate of the oligo(ethylene oxide) substituted diaminotriazine **1** with four molecules of the two-chain partially fluorinated benzoic acid **2-[F<sub>6</sub>C<sub>4</sub>]** with a pronounced circular shape.

a)

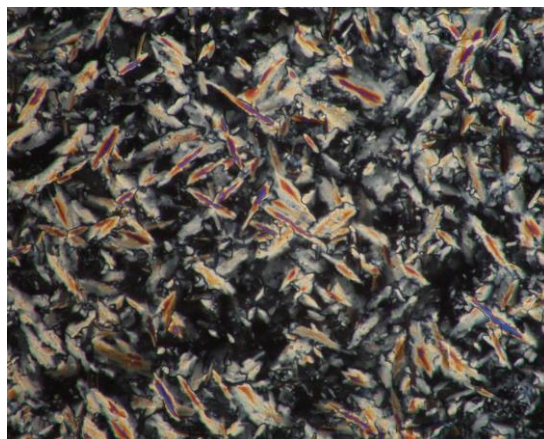

b)

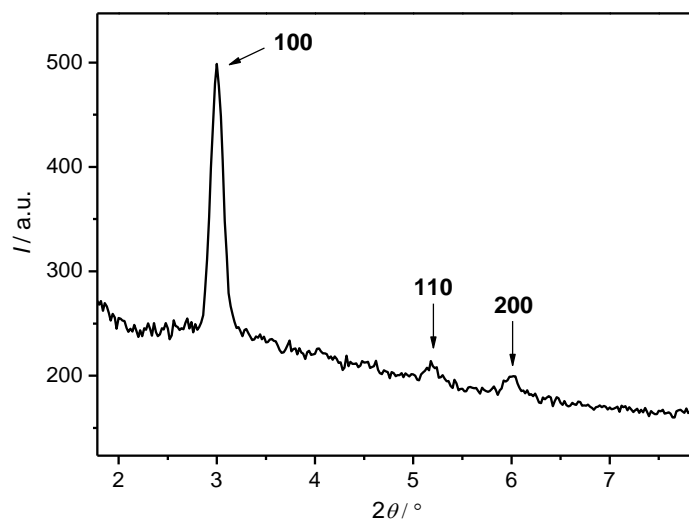

**Figure S5.** (a) Optical texture observed for the hexagonal columnar phase of the (1:2)  $\frac{1}{2}$ -[F<sub>6</sub>C<sub>4</sub>] mixture; (b) SAXS diffractogram of the Col<sub>h</sub> phase of the (1:2) mixture  $\frac{1}{2}$ -[F<sub>6</sub>C<sub>4</sub>] at 50°C.
